# Supplementary material for: Lipidome profiles of postnatal day 2 vaginal swabs reflect fat composition of gilt’s postnatal diet
Source: PLoS One. 2019 Sep 26;14(9):e0215186. doi: 10.1371/journal.pone.0215186 (PMC6762109; doi:10.1371/journal.pone.0215186)
Supplement: S3 Table — (XLSX) [file pone.0215186.s005.xlsx]

## Sheet: S3 Table
Table S3: Selected MRM Transitions for Method 1 (Bottle-fed versus Suckled)
Prec and NL Scan	Lipid Class	Ion Pair	Compound Name	ISTD?	Precursor Ion	MS1 Res	Product Ion	MS2 Res	Dwell	Fragmentor	Collision Energy	Polarity
AC60	acylcarnitine	204.1000061 - 85.09560937	AC60	FALSE	204.1	Unit	85.1	Unit	25	100	28	Positive
AC56	acylcarnitine	232.1000061 - 85.09560937	AC56	FALSE	232.1	Unit	85.1	Unit	25	100	28	Positive
FFA27	free fatty acid	253.3000031 - 253.2967813	FFA27	FALSE	253.3	Unit	253.3	Unit	25	100	0	Negative
FFA20	free fatty acid	301.2999878 - 301.2967812	FFA20	FALSE	301.3	Unit	301.3	Unit	25	100	0	Negative
FFA19	free fatty acid	303.2999878 - 303.2967812	FFA19	FALSE	303.3	Unit	303.3	Unit	25	100	0	Negative
72	acylcarnitine	305.7000122 - 85.09560937	17	FALSE	305.7	Unit	85.1	Unit	25	100	28	Positive
72	acylcarnitine	338.3999939 - 85.09560937	30	FALSE	338.4	Unit	85.1	Unit	25	100	28	Positive
AC35	acylcarnitine	346.2000122 - 85.09560937	AC35	FALSE	346.2	Unit	85.1	Unit	25	100	28	Positive
72	acylcarnitine	349.5 - 85.09560937	35	FALSE	349.5	Unit	85.1	Unit	25	100	28	Positive
AC33	acylcarnitine	360.2999878 - 85.09560937	AC33	FALSE	360.3	Unit	85.1	Unit	25	100	28	Positive
AC32	acylcarnitine	368.2999878 - 85.09560937	AC32	FALSE	368.3	Unit	85.1	Unit	25	100	28	Positive
72	acylcarnitine	391.6000061 - 85.09560937	56	FALSE	391.6	Unit	85.1	Unit	25	100	28	Positive
72	acylcarnitine	394.5 - 85.09560937	59	FALSE	394.5	Unit	85.1	Unit	25	100	28	Positive
AC25	acylcarnitine	398.2999878 - 85.09560937	AC25	FALSE	398.3	Unit	85.1	Unit	25	100	28	Positive
72	acylcarnitine	399.1000061 - 85.09560937	64	FALSE	399.1	Unit	85.1	Unit	25	100	28	Positive
AC24	acylcarnitine	400.2999878 - 85.09560937	AC24	FALSE	400.3	Unit	85.1	Unit	25	100	28	Positive
22	glycerolipids containing 18:1 residue - positive ion mode	400.3999939 - 101.0956094	155	FALSE	400.4	Unit	101.1	Unit	25	100	22	Positive
72	acylcarnitine	401.2000122 - 85.09560937	66	FALSE	401.2	Unit	85.1	Unit	25	100	28	Positive
7	Phosphatidylinositol (PI)	410.2999878 - 132.996	74	FALSE	410.3	Unit	133	Unit	25	100	22	Positive
AC22	acylcarnitine	412.2999878 - 85.09560937	AC22	FALSE	412.3	Unit	85.1	Unit	25	100	28	Positive
34	glycerolipids containing 22:2 residue - positive ion mode	412.3999939 - 59.09609766	223	FALSE	412.4	Unit	59.1	Unit	25	100	22	Positive
35	glycerolipids containing 22:1 residue - positive ion mode	414 - 58.69619531	236	FALSE	414	Unit	58.7	Unit	25	100	22	Positive
28	glycerolipids containing 20:1 residue - positive ion mode	416.1000061 - 88.79580469	40	FALSE	416.1	Unit	88.8	Unit	25	100	22	Positive
72	acylcarnitine	418.7999878 - 85.09560937	77	FALSE	418.8	Unit	85.1	Unit	25	100	28	Positive
AC18	acylcarnitine	426.3999939 - 85.09560937	AC18	FALSE	426.4	Unit	85.1	Unit	25	100	28	Positive
72	acylcarnitine	427.2999878 - 85.09560937	82	FALSE	427.3	Unit	85.1	Unit	25	100	28	Positive
AC17	acylcarnitine	428.3999939 - 85.09560937	AC17	FALSE	428.4	Unit	85.1	Unit	25	100	28	Positive
72	acylcarnitine	429.2999878 - 85.09560937	84	FALSE	429.3	Unit	85.1	Unit	25	100	28	Positive
82	glycerolipids containing 24:1 residue - positive ion mode	442.3999939 - 59.09609766	216	FALSE	442.4	Unit	59.1	Unit	25	100	22	Positive
28	glycerolipids containing 20:1 residue - positive ion mode	446.3999939 - 119.0956094	44	FALSE	446.4	Unit	119.1	Unit	25	100	22	Positive
72	acylcarnitine	446.8999939 - 85.09560937	94	FALSE	446.9	Unit	85.1	Unit	25	100	28	Positive
FFA3	free fatty acid	451.3999939 - 451.3944375	FFA3	FALSE	451.4	Unit	451.4	Unit	25	100	0	Negative
7	Phosphatidylinositol (PI)	454.2000122 - 176.8963906	78	FALSE	454.2	Unit	176.9	Unit	25	100	22	Positive
AC7	acylcarnitine	464.2999878 - 85.09560937	AC7	FALSE	464.3	Unit	85.1	Unit	25	100	28	Positive
22	glycerolipids containing 18:1 residue - positive ion mode	476.5 - 177.1952188	169	FALSE	476.5	Unit	177.2	Unit	25	100	22	Positive
37	glycerolipids containing 24:0 residue - positive ion mode	502.3999939 - 117.0956094	17	FALSE	502.4	Unit	117.1	Unit	25	100	22	Positive
72	acylcarnitine	503.7999878 - 85.09560937	119	FALSE	503.8	Unit	85.1	Unit	25	100	28	Positive
22	glycerolipids containing 18:1 residue - positive ion mode	514.4000244 - 215.0956094	170	FALSE	514.4	Unit	215.1	Unit	25	100	22	Positive
82	glycerolipids containing 24:1 residue - positive ion mode	514.5 - 131.1952188	231	FALSE	514.5	Unit	131.2	Unit	25	100	22	Positive
88	glycerolipids containing 24:6 residue - positive ion mode	518.4000244 - 143.0956094	61	FALSE	518.4	Unit	143.1	Unit	20	100	22	Positive
85	glycerolipids containing 30:0 residue - positive ion mode	526.5 - 57.19619531	3	FALSE	526.5	Unit	57.2	Unit	20	100	22	Positive
72	acylcarnitine	555.5 - 85.09560937	142	FALSE	555.5	Unit	85.1	Unit	25	100	28	Positive
72	acylcarnitine	557.5999756 - 85.09560937	143	FALSE	557.6	Unit	85.1	Unit	25	100	28	Positive
19	glycerolipids containing 16:0 residue - positive ion mode	558.4000244 - 285.0975625	79	FALSE	558.4	Unit	285.1	Unit	25	100	22	Positive
72	acylcarnitine	561.2999878 - 85.09560937	144	FALSE	561.3	Unit	85.1	Unit	25	100	28	Positive
72	acylcarnitine	572.2000122 - 85.09560937	148	FALSE	572.2	Unit	85.1	Unit	25	100	28	Positive
CE12:0	cholesterol ester	587.2000122 - 369.0975625	CE12:0	FALSE	587.2	Unit	369.1	Unit	20	100	15	Positive
91	sugar lipids	607.4000244 - 445.0975625	79	FALSE	607.4	Unit	445.09	Unit	20	100	22	Positive
72	acylcarnitine	618.5 - 85.09560937	167	FALSE	618.5	Unit	85.1	Unit	25	100	28	Positive
32	glycerolipids containing 22:5 residue -positive ion mode	627.7000122 - 280.3944375	152	FALSE	627.7	Unit	280.4	Unit	25	100	22	Positive
28	glycerolipids containing 20:1 residue - positive ion mode	638.4000244 - 311.0975625	56	FALSE	638.4	Unit	311.1	Unit	25	100	22	Positive
22	glycerolipids containing 18:1 residue - positive ion mode	638.5 - 339.1952187	175	FALSE	638.5	Unit	339.2	Unit	25	100	22	Positive
72	acylcarnitine	638.7000122 - 85.09560937	172	FALSE	638.7	Unit	85.1	Unit	25	100	28	Positive
22	glycerolipids containing 18:1 residue - positive ion mode	640.5999756 - 341.2967812	176	FALSE	640.29	Unit	340.99	Unit	25	100	22	Positive
22	glycerolipids containing 18:1 residue - positive ion mode	640.2999878 - 340.996	176	FALSE	640.29	Unit	340.99	Unit	25	100	22	Positive
23	glycerolipids containing 18:0 residue - positive ion mode	640.4000244 - 339.0975625	206	FALSE	640.4	Unit	339.1	Unit	25	100	22	Positive
77	cholesterol ester	640.5 - 369.0975625	188	FALSE	640.5	Unit	369.1	Unit	25	100	17	Positive
6	Phosphatydylserine (PS)	644.2000122 - 458.996	61	FALSE	644.2	Unit	459	Unit	25	100	20	Positive
25	glycerolipids containing 20:4 residue - positive ion mode	662.4000244 - 341.0975625	252	FALSE	662.4	Unit	341.1	Unit	25	100	22	Positive
CE18:0	cholesterol ester	671.2999878 - 369.0975625	CE18:0	FALSE	671.3	Unit	369.1	Unit	20	100	15	Positive
72	acylcarnitine	674.5 - 85.09560937	178	FALSE	674.5	Unit	85.1	Unit	25	100	28	Positive
38	Phosphatidylcholine (PC), alkelnyl-acyl PC (ePC), sphingomyelin (SM) and LysoPC	678.5999756 - 184.1952188	31	FALSE	678.6	Unit	184.2	Unit	25	100	22	Positive
72	acylcarnitine	692.5 - 85.09560937	183	FALSE	692.5	Unit	85.1	Unit	25	100	28	Positive
CE20:0	cholesterol ester	699.4000244 - 369.0975625	CE20:0	FALSE	699.4	Unit	369.1	Unit	20	100	15	Positive
38	Phosphatidylcholine (PC), alkelnyl-acyl PC (ePC), sphingomyelin (SM) and LysoPC	706.7000122 - 184.1952188	39	FALSE	706.7	Unit	184.2	Unit	25	100	22	Positive
15	glycerolipids containing 12:0 residue - positive ion mode	712.5 - 495.1952187	126	FALSE	712.5	Unit	495.2	Unit	25	100	22	Positive
15	glycerolipids containing 12:0 residue - positive ion mode	738.5 - 521.199125	130	FALSE	738.5	Unit	521.2	Unit	25	100	22	Positive
15	glycerolipids containing 12:0 residue - positive ion mode	739.5999756 - 522.292875	131	FALSE	739.6	Unit	522.3	Unit	25	100	22	Positive
72	acylcarnitine	748.2999878 - 85.09560937	192	FALSE	748.3	Unit	85.1	Unit	25	100	28	Positive
38	Phosphatidylcholine (PC), alkelnyl-acyl PC (ePC), sphingomyelin (SM) and LysoPC	757 - 184.1952188	56	FALSE	757	Unit	184.2	Unit	25	100	22	Positive
38	Phosphatidylcholine (PC), alkelnyl-acyl PC (ePC), sphingomyelin (SM) and LysoPC	758.5 - 184.1952188	57	FALSE	758.5	Unit	184.2	Unit	25	100	22	Positive
18	glycerolipids containing 16:1 residue - positive ion mode	766.5 - 495.1952187	34	FALSE	766.5	Unit	495.2	Unit	25	100	20	Positive
16	glycerolipids containing 14:0 residue - positive ion mode	766.5 - 521.199125	153	FALSE	766.5	Unit	521.2	Unit	25	100	22	Positive
4	Phosphatidylethanolamine (PE)	766.5 - 549.199125	138	FALSE	766.5	Unit	549.2	Unit	25	100	22	Positive
15	glycerolipids containing 12:0 residue - positive ion mode	767.0999756 - 549.792875	139	FALSE	767.1	Unit	549.8	Unit	25	100	22	Positive
19	glycerolipids containing 16:0 residue - positive ion mode	768.4000244 - 495.0975625	94	FALSE	768.4	Unit	495.1	Unit	25	100	22	Positive
16	glycerolipids containing 14:0 residue - positive ion mode	768.5 - 523.199125	155	FALSE	768.5	Unit	523.2	Unit	25	100	22	Positive
31	glycerolipids containing 22:6 residue - positive ion mode	774 - 428.6952187	129	FALSE	774	Unit	428.7	Unit	25	100	22	Positive
38	Phosphatidylcholine (PC), alkelnyl-acyl PC (ePC), sphingomyelin (SM) and LysoPC	774.5 - 184.1952188	66	FALSE	774.5	Unit	184.2	Unit	25	100	22	Positive
38	Phosphatidylcholine (PC), alkelnyl-acyl PC (ePC), sphingomyelin (SM) and LysoPC	775.7999878 - 184.1952188	67	FALSE	775.8	Unit	184.2	Unit	25	100	22	Positive
38	Phosphatidylcholine (PC), alkelnyl-acyl PC (ePC), sphingomyelin (SM) and LysoPC	776.0999756 - 184.1952188	68	FALSE	776.1	Unit	184.2	Unit	25	100	22	Positive
38	Phosphatidylcholine (PC), alkelnyl-acyl PC (ePC), sphingomyelin (SM) and LysoPC	784.5 - 184.1952188	71	FALSE	784.5	Unit	184.2	Unit	25	100	22	Positive
38	Phosphatidylcholine (PC), alkelnyl-acyl PC (ePC), sphingomyelin (SM) and LysoPC	785.5 - 184.1952188	72	FALSE	785.5	Unit	184.2	Unit	25	100	22	Positive
18	glycerolipids containing 16:1 residue - positive ion mode	792.5 - 521.199125	38	FALSE	792.5	Unit	521.2	Unit	25	100	20	Positive
19	glycerolipids containing 16:0 residue - positive ion mode	793.7000122 - 520.3944375	102	FALSE	793.7	Unit	520.4	Unit	25	100	22	Positive
19	glycerolipids containing 16:0 residue - positive ion mode	794.5 - 521.199125	103	FALSE	794.5	Unit	521.2	Unit	25	100	22	Positive
18	glycerolipids containing 16:1 residue - positive ion mode	794.5 - 523.199125	39	FALSE	794.5	Unit	523.2	Unit	25	100	20	Positive
16	glycerolipids containing 14:0 residue - positive ion mode	794.5 - 549.199125	162	FALSE	794.5	Unit	549.2	Unit	25	100	22	Positive
72	acylcarnitine	795.2000122 - 85.09560937	202	FALSE	795.2	Unit	85.1	Unit	25	100	28	Positive
16	glycerolipids containing 14:0 residue - positive ion mode	795.5 - 550.199125	163	FALSE	795.5	Unit	550.2	Unit	25	100	22	Positive
19	glycerolipids containing 16:0 residue - positive ion mode	796.0999756 - 522.792875	104	FALSE	796.1	Unit	522.8	Unit	25	100	22	Positive
15	glycerolipids containing 12:0 residue - positive ion mode	796.5 - 579.199125	144	FALSE	796.5	Unit	579.2	Unit	25	100	22	Positive
38	Phosphatidylcholine (PC), alkelnyl-acyl PC (ePC), sphingomyelin (SM) and LysoPC	797 - 184.1952188	81	FALSE	797	Unit	184.2	Unit	25	100	22	Positive
38	Phosphatidylcholine (PC), alkelnyl-acyl PC (ePC), sphingomyelin (SM) and LysoPC	801.5999756 - 184.1952188	83	FALSE	801.6	Unit	184.2	Unit	25	100	22	Positive
22	glycerolipids containing 18:1 residue - positive ion mode	808.5999756 - 509.2967812	178	FALSE	808.6	Unit	509.3	Unit	25	100	22	Positive
TAG_18:1_1	TAG	818.7999878 - 519.792875	TAG_18:1_1	FALSE	818.8	Unit	519.8	Unit	25	100	22	Positive
TAG_18:2_1	TAG	818.7999878 - 521.792875	TAG_18:2_1	FALSE	818.8	Unit	521.8	Unit	25	100	22	Positive
22	glycerolipids containing 18:1 residue - positive ion mode	820.7000122 - 521.3944375	179	FALSE	820.7	Unit	521.4	Unit	25	100	22	Positive
TAG_18:1_2	TAG	820.7999878 - 521.792875	TAG_18:1_2	FALSE	820.8	Unit	521.8	Unit	25	100	22	Positive
TAG_18:2_2	TAG	820.7999878 - 523.792875	TAG_18:2_2	FALSE	820.8	Unit	523.8	Unit	25	100	22	Positive
TAG_16:0_2	TAG	820.7999878 - 547.792875	TAG_16:0_2	FALSE	820.8	Unit	547.8	Unit	25	100	22	Positive
TAG_16:1_2	TAG	820.7999878 - 549.792875	TAG_16:1_2	FALSE	820.8	Unit	549.8	Unit	25	100	22	Positive
18	glycerolipids containing 16:1 residue - positive ion mode	821.5 - 550.199125	49	FALSE	821.5	Unit	550.2	Unit	25	100	20	Positive
16	glycerolipids containing 14:0 residue - positive ion mode	822.5 - 577.199125	169	FALSE	822.2	Unit	576.9	Unit	25	100	22	Positive
22	glycerolipids containing 18:1 residue - positive ion mode	822.2999878 - 522.996	180	FALSE	822.3	Unit	523	Unit	25	100	22	Positive
TAG_18:0_3	TAG	822.7999878 - 521.792875	TAG_18:0_3	FALSE	822.8	Unit	521.8	Unit	25	100	22	Positive
TAG_18:1_3	TAG	822.7999878 - 523.792875	TAG_18:1_3	FALSE	822.8	Unit	523.8	Unit	25	100	22	Positive
TAG_18:2_3	TAG	822.7999878 - 525.792875	TAG_18:2_3	FALSE	822.8	Unit	525.8	Unit	25	100	22	Positive
TAG_16:0_3	TAG	822.7999878 - 549.792875	TAG_16:0_3	FALSE	822.8	Unit	549.8	Unit	25	100	22	Positive
TAG_16:1_3	TAG	822.7999878 - 551.792875	TAG_16:1_3	FALSE	822.8	Unit	551.8	Unit	25	100	22	Positive
TAG_18:0_4	TAG	824.7999878 - 523.792875	TAG_18:0_4	FALSE	824.8	Unit	523.8	Unit	25	100	22	Positive
TAG_16:0_4	TAG	824.7999878 - 551.792875	TAG_16:0_4	FALSE	824.8	Unit	551.8	Unit	25	100	22	Positive
91	sugar lipids	833.5 - 671.292875	85	FALSE	833.5	Unit	671.3	Unit	20	100	22	Positive
19	glycerolipids containing 16:0 residue - positive ion mode	838.7000122 - 565.3944375	110	FALSE	838.7	Unit	565.4	Unit	25	100	22	Positive
91	sugar lipids	845.5 - 683.0975625	86	FALSE	845.5	Unit	683.1	Unit	20	100	22	Positive
TAG_16:0_5	TAG	846.7999878 - 573.792875	TAG_16:0_5	FALSE	846.8	Unit	573.8	Unit	25	100	22	Positive
TAG_16:1_5	TAG	846.7999878 - 575.792875	TAG_16:1_5	FALSE	846.8	Unit	575.8	Unit	25	100	22	Positive
23	glycerolipids containing 18:0 residue - positive ion mode	849.5999756 - 548.292875	218	FALSE	849.6	Unit	548.3	Unit	25	100	22	Positive
32	glycerolipids containing 22:5 residue -positive ion mode	849.7999878 - 502.496	171	FALSE	849.8	Unit	502.5	Unit	25	100	22	Positive
TAG_18:0_7	TAG	850.7999878 - 549.792875	TAG_18:0_7	FALSE	850.8	Unit	549.8	Unit	25	100	22	Positive
TAG_18:1_7	TAG	850.7999878 - 551.792875	TAG_18:1_7	FALSE	850.8	Unit	551.8	Unit	25	100	22	Positive
TAG_16:0_7	TAG	850.7999878 - 577.792875	TAG_16:0_7	FALSE	850.8	Unit	577.8	Unit	25	100	22	Positive
TAG_18:0_8	TAG	852.7999878 - 551.792875	TAG_18:0_8	FALSE	852.8	Unit	551.8	Unit	25	100	22	Positive
TAG_16:0_8	TAG	852.7999878 - 579.792875	TAG_16:0_8	FALSE	852.8	Unit	579.8	Unit	25	100	22	Positive
TAG_16:1_10	TAG	870.7999878 - 599.792875	TAG_16:1_10	FALSE	870.8	Unit	599.8	Unit	25	100	22	Positive
TAG_18:1_11	TAG	872.7999878 - 573.792875	TAG_18:1_11	FALSE	872.8	Unit	573.8	Unit	25	100	22	Positive
TAG_16:0_11	TAG	872.7999878 - 599.792875	TAG_16:0_11	FALSE	872.8	Unit	599.8	Unit	25	100	22	Positive
TAG_16:1_11	TAG	872.7999878 - 601.792875	TAG_16:1_11	FALSE	872.8	Unit	601.8	Unit	25	100	22	Positive
TAG_18:1_12	TAG	874.7999878 - 575.792875	TAG_18:1_12	FALSE	874.8	Unit	575.8	Unit	25	100	22	Positive
TAG_16:0_12	TAG	874.7999878 - 601.792875	TAG_16:0_12	FALSE	874.8	Unit	601.8	Unit	25	100	22	Positive
TAG_16:1_12	TAG	874.7999878 - 603.792875	TAG_16:1_12	FALSE	874.8	Unit	603.8	Unit	25	100	22	Positive
TAG_18:0_14	TAG	878.7999878 - 577.792875	TAG_18:0_14	FALSE	878.8	Unit	577.8	Unit	25	100	22	Positive
TAG_18:1_14	TAG	878.7999878 - 579.792875	TAG_18:1_14	FALSE	878.8	Unit	579.8	Unit	25	100	22	Positive
TAG_16:0_14	TAG	878.7999878 - 605.792875	TAG_16:0_14	FALSE	878.8	Unit	605.8	Unit	25	100	22	Positive
TAG_18:0_15	TAG	880.7999878 - 579.792875	TAG_18:0_15	FALSE	880.8	Unit	579.8	Unit	25	100	22	Positive
TAG_18:1_19	TAG	898.7999878 - 599.792875	TAG_18:1_19	FALSE	898.8	Unit	599.8	Unit	25	100	22	Positive
TAG_18:2_19	TAG	898.7999878 - 601.792875	TAG_18:2_19	FALSE	898.8	Unit	601.8	Unit	25	100	22	Positive
22	glycerolipids containing 18:1 residue - positive ion mode	900.5 - 601.199125	189	FALSE	900.5	Unit	601.2	Unit	25	100	22	Positive
TAG_18:0_20	TAG	900.7999878 - 599.792875	TAG_18:0_20	FALSE	900.8	Unit	599.8	Unit	25	100	22	Positive
TAG_18:1_20	TAG	900.7999878 - 601.792875	TAG_18:1_20	FALSE	900.8	Unit	601.8	Unit	25	100	22	Positive
TAG_18:0_21	TAG	902.7999878 - 601.792875	TAG_18:0_21	FALSE	902.8	Unit	601.8	Unit	25	100	22	Positive
TAG_20:0_23	TAG	906.7999878 - 577.792875	TAG_20:0_23	FALSE	906.8	Unit	577.8	Unit	25	100	22	Positive
TAG_18:1_23	TAG	906.7999878 - 607.792875	TAG_18:1_23	FALSE	906.8	Unit	607.8	Unit	25	100	22	Positive
TAG_18:1_35	TAG	946.7999878 - 647.792875	TAG_18:1_35	FALSE	946.8	Unit	647.8	Unit	25	100	22	Positive
72	acylcarnitine	995.9000244 - 85.09560937	218	FALSE	995.9	Unit	85.1	Unit	25	100	28	Positive
72	acylcarnitine	1025 - 85.09560937	220	FALSE	1025	Unit	85.1	Unit	25	100	28	Positive
